# Supplementary material for: Need to optimise infant feeding counselling: A cross-sectional survey among HIV-positive mothers in Eastern Uganda
Source: PubMed Central journal article supplement (PMC2657132; doi:10.1186/1471-2431-9-2), 2009-01-09
Supplement: 1471-2431-9-2-S1.pdf [file 1471-2431-9-2-S1.pdf]

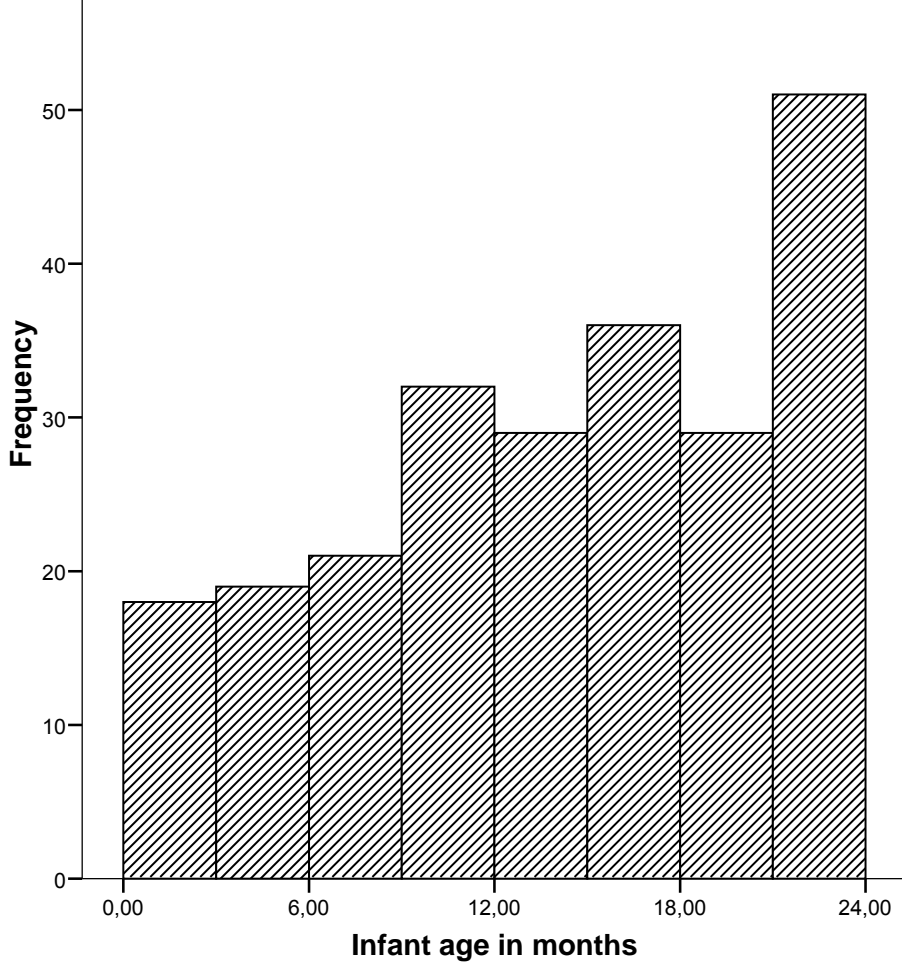

Mean =13,5021 □  
Std. Dev. =6,89133 □  
N =235
