# Supplementary material for: Need to optimise infant feeding counselling: A cross-sectional survey among HIV-positive mothers in Eastern Uganda
Source: BMC Pediatr. 2009 Jan 9;9:2. doi: 10.1186/1471-2431-9-2 (PMC2657132; doi:10.1186/1471-2431-9-2)
Supplement: Additional file 2 — Reported breastfeeding problems among 215 breastfeeding mothers. Frequency of breastfeeding problems among 215 breastfeeding mothers. [file 1471-2431-9-2-S2.pdf]

**Table 5:** Reported breastfeeding problems among 215 breastfeeding mothers

|                                                  | Main problem<br>n (%) |
|--------------------------------------------------|-----------------------|
| <i>No problems reported</i>                      | 112 (52)              |
| Related to HIV-illness (weakness, body pain etc) | 43 (20)               |
| Breast and nipple pain                           | 19 ( 9)               |
| Sore/ cracked nipple                             | 11 ( 5)               |
| Volume related/ not enough milk                  | 10 ( 5)               |
| Swelling of the breast (or nipple)               | 10 ( 5)               |
| Mastitis or abscess diagnosed                    | 3 ( 1)                |
| Other (child related, biting, etc)               | 7 ( 3)                |
| Total                                            | 215 (100)             |
